# Supplementary material for: Development of a Vector Set for High or Inducible Gene Expression and Protein Secretion in the Yeast Genus Blastobotrys
Source: MDPI journal article supplement (doi:10.3390/jof8050418), 2022-04-19
Supplement: s1 [file s1]

## File S1: Sequences and alignment of endo-1,5-alpha-L-arabinanases (GH43 AnAbnA-like)

>Aspergillus.niger\_CBS513.88\_XP\_001397586.2 arabinan endo-1,5-alpha-L-arabinosidase D

MKSITMLPSLLSVLFFLLYAVNAVPLAPRASALAGIDTKSFSKTKDYPLPNLGNIVAHDPNVIQHDGYFY  
LYKGGVHIPIHRARSLSGPWEQVGTVLDDSSVIPKQNRSRPWAPTTIQHDNRFYCFYAISENGSRDSAIG  
VASSDTPVGGNWTDHGAVVNTGKGDLSDIYPYSVSNDAIDGAFITDQQTGQSHLLYGSYWHGIFSVPLADD  
LLSVKTPKTPNATNLAYIPDAKSKPIEGSFMTYKAPYYLWFSHGKCCHFDIHAFPPMGDEYNIRVGRSK  
SATGPFVVDKGDHDTLKGGGTIVYGSNHGIVYAPGGVGVLINNGSEADVLYYHYLNTTSGFAQGD AHLGWN  
YLHYVNGWPVAVEGYVNANGK

>Blastobotrys.raffinosisfermentans\_ARAD1D18216

MKSQLIATATVALGSMSSVVAASKTDDSNTRYDRFRGLVDSNTYDLMNNSLGGTYVHTPNLTVIDTPD  
WPLPNPVIIGDIVPWGGVHLHDPSIIKHNGYYYSFTTHNLIGISKAPSMFGPWQKIGSVLEESSIINSTG  
STDPWAPDVQKVGDTFYCYAVSSFGSPKSSIGLATSKTLEPGSWTDHGEVISSGNAPYPLNDSNAID  
ANLLVVENGNSVQEAYLLWGSFWSNIWQIKLNNDLTVPDNAIANAVQLAYDGTIDTHPVEGAYLHKASN  
GYYYL FVSNGVCCGYDAALPDAGREYKILVGRSKSPSGPFLDKNGVDMAKGGGSRIYGSHGIVYGPGGQ  
GVFTDDDGQDIIYYHYVDLRVSLADDDKRLGWNLYKYEDGWPKLV

>Blastobotrys.mokoenaii\_ABN1

MKVILQTIASVLLATLSAAADSSSDQVNRFRGIVDQSVYNTLNNSLGGTYVHTPNFTVIDTPDWPLPNP  
VVGDIVPWGGVHIHDPSIIKHNGNYYSFSTHDLVAISKAPTMYGPWTKIGSVLEKQSI IENSGRGPWA  
PDVHKVGDTFYCYAVSSFGSQNSSIGLATSKTLEPGSWTDHGAVLTSSPSAEHPLDVSNDAIDANLFVV  
EDKKGNVQDAYLLWGSFWSNIWQIKLNKDLTVPDGALEKAVNVAFDGTIDTHPVEGAYLHLAKNGYYYL  
FVSNAGCCGYSNGLPDAGREYKILVGRSKSPSGPFLDKNGKSMAEGGGYRIYGSHGNIYGPGGQGVFTD  
DDGQDIIYYHYVDLRVSLVDEDKRLGWNLYKYDKDGWPYLA

>Trichomonascus.ciferrii\_KAA8914121.1

MRFFLIACFWGAAAVAKESVEPSTYDLLNNSVGGTYVRESQFTVANTPDWPLPKPVTGDTDPWGGVHVHD  
PCILKHDGYYSFTTHNLVGISRAKSMEGPWEEKIGSVLEGSSI INNTGSADPWAPDVHKVGDTFYCYYSV  
STFGSQNSSIGLATSKTLEPGSWTDHGFPVLTSTPDAQFPLNDSNAIDANLMVVEKKNEVKEAYLLWGSFW  
SNIWGVKLNEDLSPEDALDIAHYAYDSTIDTHPVEGYPYLHARNGYYL FVSNGVCCGYNNSLPDAGR  
EYKILVGRSKNPEGPFLLDKNGIDMVNGGGSRIYGSHGIVYGPGGQGVFTDDNGEDI IYYHYVDLRVSLID  
EDKRLGWNLYKYDKDDWPYLV

>Tothia.fuscella\_KAF2437171.1

MFALTTIWPLVIAIASALTTSNPFQSQNWPLPHNITGTDTPGQWGGVHLHDPSIVQGPDGAYYSFSTHGL  
VSISRASVLDGYWEHIGSVLTRQSIIDLPRNDTWAPDVSKIGNTYCYYSISTFGSQNSAIGLATSQTL  
LPGSWTDHGAVLESKDKRYPLNATNGIDANI FVDEKSGEVFLNYGSFWSDIWQFKLLKDLKGLDWSWPP  
KQLSFEPKGTNPEEGASISENKGWYYLWVSHGVCCGFNTTLPVKGEEYEILVGRSKTHYGPFDVREGKDM  
KNGGGSVVYGSHEYVYGPGGQGV LKYNNGRDVLYFHYVPTYISYLDTDKRLGWDYIDYVDGWVPVLVY

>Rhizodiscina.lignyota\_KAF2093984.1

MLLLVFALIAIAARAASHDPFSPANWPLPHNITGDSLSTSTGQWGGVHVHDPSVVKGPDGYYSFSTHNLV  
AISKAPSLDGYWKFIGSVLKGESVIPLAGRNDTWAPNVVQIGDTYYCYYSVSTFGSMDSGIGLATSRTLQ  
PGSWTDHGAVLESATKEYPLNDTNAIDPNFFHDPKTGENLLNYGSFWSDIWQFQLAKDLKSVLWKPPPV  
HLSFDPVGTNPEEGSFMSYHDGWYYLWYSHGICCGYNVSALPPPQGEYSIRLGRSKSSHGPFLDRNGTDL  
VDGGGYIVYGSHDYVYGPGGQGV LQDYHGRDVLYYHYVPTYISYLDTDKRLGWDYIDYVDGWVPVLVY

>Aureobasidium.pullulans\_THY28006.1

MYALITKIGALAVASLATQAVAVPSNSKPDPFNSASWPLPHNVSGVSNPGANESYQWGGVHLHDPSIVM  
GPDGHFYSFSTHGLVVISRASQPNSLDGYWEPIGSLVLEGSSI INNTGSTDPWAPDVHKVGDTYYCYYSV  
QFGSQFSSIGLATSKTLPQSWVDHGAVLTSTTAPSPNLITNAIDANLFI DPKTKI PYLTYGSFWSDIW  
QFQLAKDLLSVVWTPAPVQLSLDPVSPQAEAGAYLSRHDSWYYLWYSHGSCCGYNVSALPAPGQEYSIRV  
GRSRSATGPFVDRNGVDLRNGGGYIIYGSHDYVYGPGGQAVLTNYHGRDVLYYHYVNTIQNPTYVDELKL  
LGWNYINYIQGWVPLSYD

>Hortaea.werneckii\_RMX89073.1

MPCFNGFTALALASLGTSTVLSAPSGDWKGHGWRGHKDPFSNASWPLPRKVYGENDTANIDSATEGW  
GGIHLHDPSIVLGPDGHYYSFSTHGLTVISRASKKGSIDGYWEIIGSVLDAGSSVIDNSGSTDPWAPDVH  
KVGDTYYDYYSVSQFGSQISAIGLATSKTLMPSWTDHGEVFSSDPNATYPLNVTNAIDANLFI DPKTKT  
PYINYGSFWSNIYQFELTDDLKDVKQDTALQLSLDPVAPQPEEGAYMNYHDGWYYLWYSHGTCCGYNAS  
LPAPGEEYSIRVGRSRSPRGPFDVREGVKLTEGGGYIVYGSHDYVYGPGGQGV LSYHGRDVLYYHYVNT  
IVDPSYADNLKLLGWNYYIDYIQGWVPLSYH
