# Supplementary material for: Development of a Vector Set for High or Inducible Gene Expression and Protein Secretion in the Yeast Genus Blastobotrys
Source: MDPI journal article supplement (doi:10.3390/jof8050418), 2022-04-19
Supplement: s1 [file s1]

Table S4: Sequence identity in the ITS and D1D2 domains of the 26S rRNA gene of *Blastobotrys* species

|                         |               | <b>Y6417</b> | <b>Y27120</b> | <b>YB1343</b> | <b>L1-24</b> | <b>L2-36</b> |
|-------------------------|---------------|--------------|---------------|---------------|--------------|--------------|
| <i>B. malaysiensis</i>  | <b>Y6417</b>  | 1134         | 99%           | 97%           | 97%          | 97%          |
|                         |               |              | 0%            | 0%            | 0%           | 0%           |
| <i>B. mokoensis</i>     | <b>Y27120</b> | 1125         | 1136          | 97%           | 97%          | 97%          |
|                         |               | 2            |               | 0%            | 0%           | 0%           |
| <i>B. illinoisensis</i> | <b>YB1343</b> | 1114         | 1113          | 1132          | 97%          | 97%          |
|                         |               | 8            | 6             |               | 0%           | 0%           |
| <i>B. yvelinesensis</i> | <b>L1-24</b>  | 1113         | 1113          | 1111          | 1134         | 100%         |
|                         |               | 10           | 8             | 4             |              | 0%           |
| <i>B. yvelinesensis</i> | <b>L2-36</b>  | 1113         | 1113          | 1111          | 1134         | 1134         |
|                         |               | 10           | 8             | 4             | 0            |              |

Blue coloured cells represent the number and percentage of nucleotide identity

Yellow coloured cells indicated the number of gaps and associated percentage.
