# Supplementary material for: Development of a Vector Set for High or Inducible Gene Expression and Protein Secretion in the Yeast Genus Blastobotrys
Source: MDPI journal article supplement (doi:10.3390/jof8050418), 2022-04-19
Supplement: s1 [file s1]

### File S3: Sequences and alignment of arabinoxylan alpha arabinofurano hydrolases (GH43 AXH-like)

>Apiotrichum.siamense\_AXH arabinoxylan alpha arabinofuranohydrolase  
MPSPLVSHIYTADPSAHVFDGRIYVYPSHRETDIGFNDNGDQYDMVDYHVLSDMTIGGPVTDHGVALAAKDVPWVDKQLWAP  
DAAKGADGRYYLYFPARAHDGIFRIGVAVSDKPEGPFPTQPEAIKSSFSIDPASFVDEDGTPYLYFGGLWGGQLQKYNADGTV  
FTADAPEEPSGPGVRALGPRVARLRGDMLEFDETVKEILIVDDAGEPIPADDHERRFFEAAMHKRNGVYYFSYSTGDTHLLA  
YATGSSPYGPFPTYQGTILEPVLGWTTHHSIVDFDNKTYLFYHDCELSKGVDHLRSVKCREIEYDAEGKIIQQKP

>Apiotrichum.porosum\_XP\_028476455.1  
MSAPLVTHIYTADPSAHVFDGRVYVYPSHRETDIHFNDNGDQYDMVDYHVLSDMKIGGEVTDHGVALAAKDVPWVDKQMWAP  
DAAKGADGRYYLYFPARAHDGVFRIGVAVSDKPEGPFAPQPEAIKGSFSIDPASFVDEDGTAYLYFGGLWGGQLQRYNADGTV  
SDPKAPEEPTGAGVRALGPRVARLRGDMLEFDETVREILIVDDEGNPILADDHERRFFEAAMHKRNGKYYSYSTGDTHLLA  
YGIGTSPYGPFTYQGTILEPVVGWTTTHHSIVDDFEGKSYLFYHDCELSKGVDHLRSVKCREIQYDAAGKIIKQTP

>Cutaneotrichosporon.oleaginosum\_XP\_018280189.1\_xylosidase/arabinosidase  
MPKPLVTHIYTADPSAHVFDGRLIYPSHRENDYGFDNDKGDQYDMVDYHVLSLAEEGGEVTDHGVAISAQDVPWVDKQMWAP  
DCARGKDGRHYLYFPARGHDGIFRIGVAVGDRPEGPFKAQPEPIKGSFSIDPATFVDDDGAAICYFGGLWGGQLQCYNSDGT  
YTPDVADEPSGAGVRAYGPRVARLRDDMLEFAEGVRELIVITVGGQVPADDHERRFFEAAMVHKHNGRYYSYSTGDTHLLAY  
AIGDSPYGPFEYAGTILEPVVGWTTTHHSIVENFKGKTYLFYHDCELSKGVDHLRSVKMREITYDKDGKIIKQKP

>Trichosporon.asahii var. asahii CBS2479\_XP\_014181348.1  
MPEPLVKHIYTADPSAHAFAGKIYVYPSHRETDIQFNDNGDQYDMVDYHVLSDMEVGGEVTDHGVALSAEQVPWVDKQMWAP  
DCAEKNGKYYFYFPAKADGKFKMGVAVSDKPEGPFPTQPEAMKGSFSIDPAAFVDDDGAYLYFGGLWGGQLQCYNSDGT  
DGSKQGPQEPTEGDALGPRVARLTDMLFAEPVREISITYQGKVPASDHEKRFFEAAMHKRNGKYYSYSTGDTHLIAYA  
TGDSPPYGPFEYQGTVLTPPIGWTHHSMVHFKGKDYLFYHDCSLSKGVDHLRSVKAKEMKFDGDKIVTMDP

>Humicola.insolens\_AHC72382.1 Xyl43A  
MAPLITNIYTADPSAHVFNGKLIYPSHRETDIQFNDNGDQYDMADYHVFSLDSDLPPEVTDHGVLKVEDIPWVSKQLWA  
PDAATKDGKYYLYFPARDKEGIFRIGVAVSDKPEGPFPTDPEPIKGSYSIDPAFVDDDGSAIYFGGLWGGQLQCYQKGN  
FDAEWSGPKPSGSAKALGPRVAKLTDDMRQFAEEVREIVILAPETGEPLAADDHRRFFEAAMHKNYNGKYYFSYSTGD  
THLYVAVGDSPPYGPFTYGRILEPVLGWTTHHSIVEFQGRWWLFHHDCELSKGVDHLRSVKKEIWIYDKDGKIVTEKPE

>Aspergillus.clavatus\_NRR1\_1\_XP\_001276579.1  
MASEPLVKHIYTADPSAHVFNNKLIYPSHRETDIKFNDNGDQYDMNDYHVFSTMETVGGPVTDHGVLKDSVPWVSKQLWA  
PDAATKNGKYYLYFPARDQEGIFRIGVAVGDKPEGPFPTQPNPIRGSYSIDPATFVDDDGQAYLYFGGIWGGQLQCWSKSDAG  
EWKFDASKTGPEPRGEGVLALAPRVARLTDMLFEPDSEIKELIIVDPEGKPLAADDHERRFFEAAMHKNYNGKYYFSWSTGD  
THYLVIYATGDSPPGPFPTYRGRILEPVLGWTTHHSIAEFQGWLYFYHDCSLNGVDHLRSVKMREIVYDAEGNIRLAE

>Penicillium.rokeforti\_XP\_038925552.1  
MPKPLVSHIYTADPSAHVFNNKLIYPSHDKTTITFNDNGDQYDMADYHVLSDMTITSPVTDHGVLKDSIPWVSKQLWAP  
DAATKNNKFYLFPPARDHKGIFRIGVAVSQSPEGPFIPQDNYIQGTYSIDPAFVVDDEAGGEAYLYVGGIWWGGQLQCWVEGKD  
EDGGECEVDGEGAGRKKRLVFDESRSQPQEPTEGEGVRALCPRVALLRDDMLSLVSSMKEVVILAPETGEPLAADDHERRFF  
AAVHRYQGTYYFSYSTGDTHFLAYATGDSPPGPFPTYQGRILDPVLGWTTHHSIVEFQGWLYFYHDCELSEGIDHLRSVKVR  
EIVYDDEGAHLAEQTPV

>Aspergillus.fumigatus\_Af293\_XP\_747277.1  
MSEPLVKHIYTADPSAHVFNNKLIYPSHRETDIQFNDNGDQYDMNDYHVFSLVETVGGPVTDHGVLKDSIPWVSKQLWAP  
DAATKNGKYYLYFPARDREGIFRIGVAVSDKPEGPFAPQPNPIRGSYSIDPAAFVDDDGQAYLYFGGIWGGQLQCWSRSAATG  
EWEFDASKTGPEPRGEGVKALYPRVARLTEDMLEFEGEIQELQIVDEERRPLAADDHERRFFEAAMHKNYNGKYYFSWSTGD  
THYLVIYATGDSPLGPFTYRGRILEPVLGWTTHHSIAEFQGWLYFYHDCSLSGVDHLRSVKMREIVYDAEGNIKLA

>Fusarium.tjaetaba\_XP\_037205011.1  
MAPLITNVYSADPSAHVFNGKIYVYPSHRETDIKFNDNGDQYDMADYHVFSTESLDPPAEVVDHGVLKTEDIPWVSKQLWA  
PDAAEKNGKFYLYFPARDKQGIIFRIGVAVGDKPEGPFPTDPEPIKGSYSIDPASFVDEDGQAYLYFGGLWGGQLQCYQKGN  
FDPEWQGPKEVSGEGVPAQGPRAVLKTEDMHQFADEVKEIQILDPESGKPI LGDDHRRFFEAAMHKRNGKYYFSYSTGDTH  
FLCFATGDSPPGPFPTYGGRILEPVLGWTTHHSIVEFQGWLYFYHDCELSKGVDHLRSVKAKEIFYDDDGKIIITTTAD

>Neurospora.crassa\_OR74A\_EAA36295.3  
MAPLITHTMYTADPSAHVFNGRVIYPSHRETDIQFNDNGDQYDMADYHVFSTPSLDPPQGPVTDHGVLKTEDVPWVSKQLWA  
PDAACKNGKYYLYFPARDKQGIIFRIGVAVGDKPEGPFPTQPEPIKGSYSIDPATFVDDDGAYLYFGGLWGGQLQCYQKGNV  
FDAEWQGPKEPTGKGVKSLGARVGRILTQNMLEFADEQGVREVTILAPETGEPLDADDHERRFFEAAMHKRNGKYYFSYSTGD  
THFLCYAVGDSPPGPFPTYGGRILEPVLGWTTHHSIVEFPEKSDRWLFHHDCELSKGVDHLRSVKKEIFFDEEGKICGEKQ  
AGK

>Colletotrichum.siamense\_XP\_036490221.1

MAPLIDHIYTADPSAHVFNGKIYYPSHORETDIQFNDNGDQYDMADYHVFSTSSLDPLEPVVDHGVVLKTEDVPWWSKQLWA  
PDAAFKNGKYYLYFPARDKQDIFRIGVAVSDKPEGPFPTDPEPIKGSYSIDPASFVDDGQAYLYFGGLWGGQLQCYQKGNMD  
FDPEWLGPEPSGKGVFALGPRVAKLTEDMHQFDGEVQEILILDPETKRPILGDDHERRFFEAAMHKKDNLYYFSYSTGDSH  
YLCYGTSESFPFGPTYGGRILEPVLGWTTHHSIVEFKGQWWLFHHDCELSNGVNLHRSVKVKEIFYDAEGRIITEKP

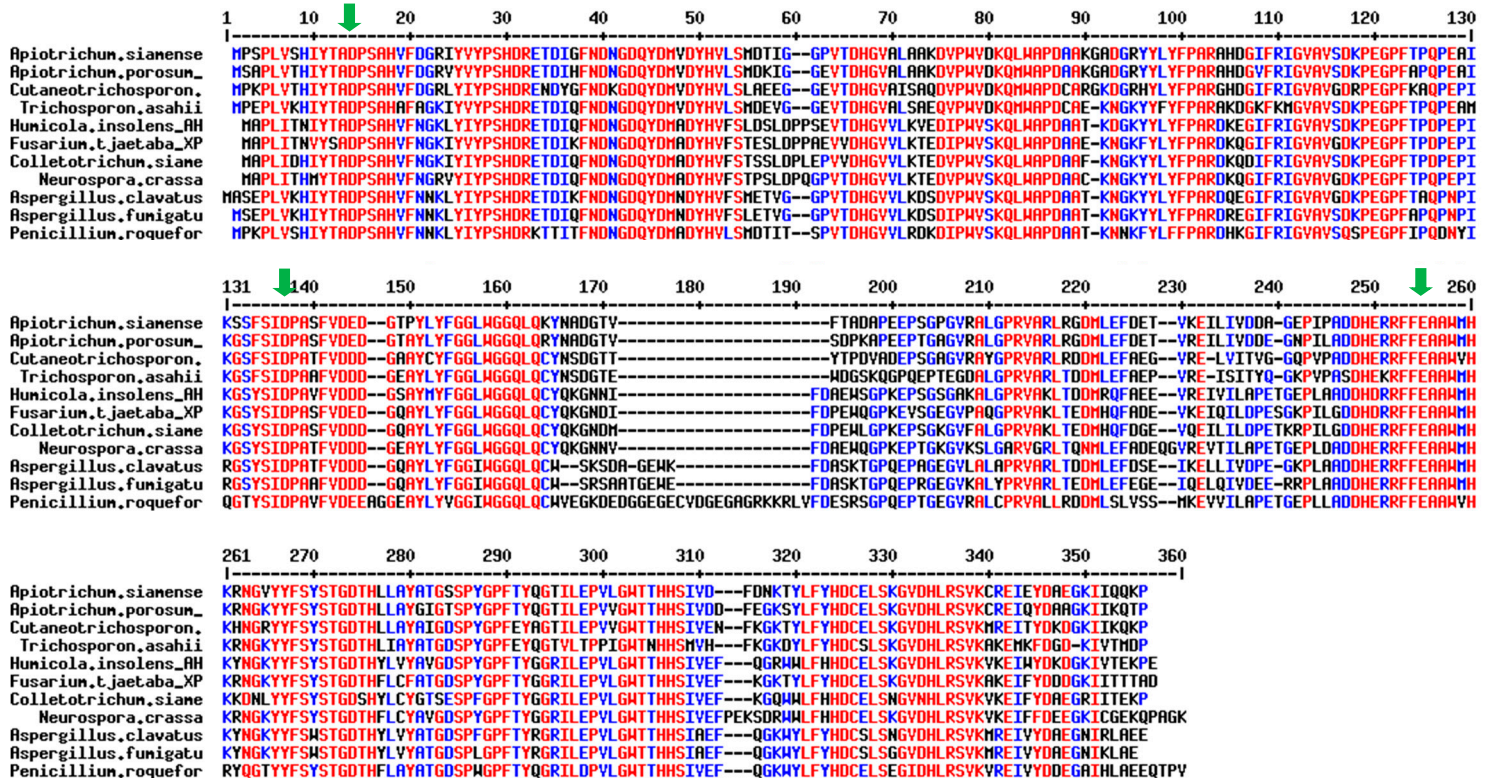

Alignments were performed with the Multalin server (<http://multalin.toulouse.inra.fr/multalin/>). The *Apiotrichum siamense* Axh1 predicted protein was aligned with Axh1 proteins from Basidiomycetes: *Apiotrichum porosum* XP\_028476455.1, *Cutaneotrichosporon oleaginosum* XP\_018280189.1 and *Trichosporon asahii* var. *asahii* CBS2479 XP\_014181348.1 and Axh1 proteins from Ascomycetes: *Humicola insolens* AHC72382.1 Xyl43A, *Aspergillus clavatus* NRRL 1 XP\_001276579.1, *Penicillium roqueforti* XP\_038925552.1, *Aspergillus fumigatus* Af293 XP\_747277.1, *Fusarium tjaetaba* XP\_037205011.1, *Neurospora crassa* OR74A EAA36295.3 and *Colletotrichum siamense* XP\_036490221.1.

↓ Acidic amino acids that form the active sites as defined for the conserved domain cd08990 (Pons et al., 2004): D in position 13, D in position 134 and E in position 225 for the *A. siamense* Axh1 protein.
