# Supplementary material for: Development of a Vector Set for High or Inducible Gene Expression and Protein Secretion in the Yeast Genus Blastobotrys
Source: MDPI journal article supplement (doi:10.3390/jof8050418), 2022-04-19

Figure S2: Cloning strategy for the construction of secretion plasmids

A

1- V5-BrABN1 cloning at *Bam*HI-*Not*I sites of pBS-SA-pTDH3-eYFP-PHO5t (Figure S1)

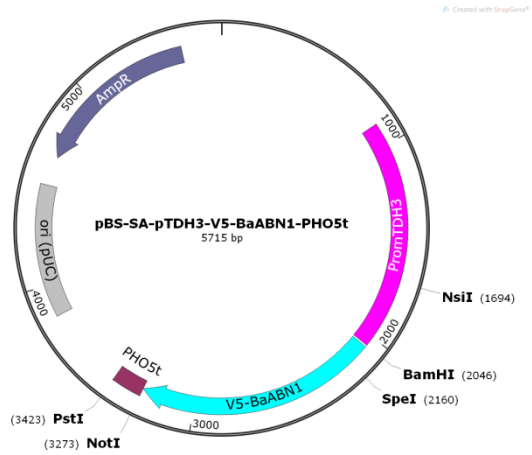

B

1- 6xHIS-BrAGU1 cloning at *Bam*HI-*Not*I sites of pBS-SA-pTEF1-eYFP-PHO5t (Figure S1)

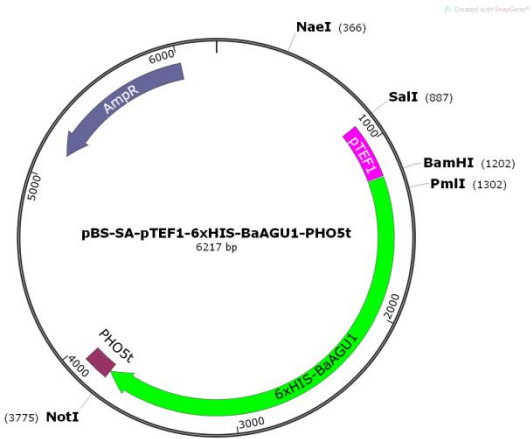

2- nat cloning at the *Pst*I site of pBS-SA-pTDH3-V5-BrABN1-PHO5t

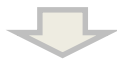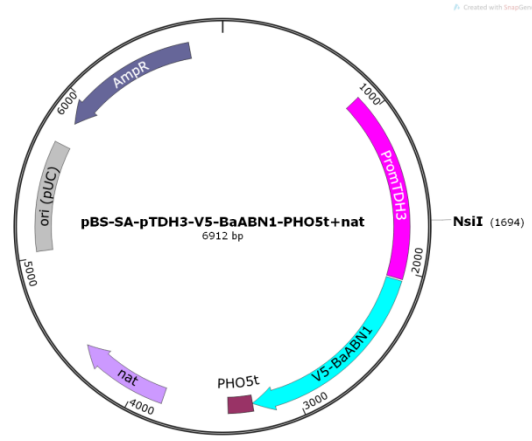

2- hph cloning at *Nae*I-*Sal*I site of pBS-SA-pTEF1-6xHIS-BrAGU1-PHO5t

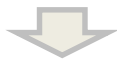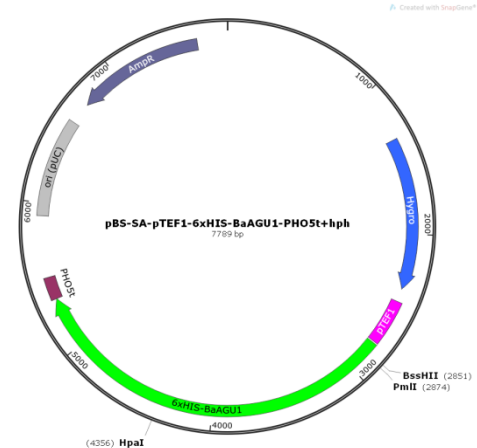

Supplement: s1 [file s1]
