# Supplementary material for: Development of a Vector Set for High or Inducible Gene Expression and Protein Secretion in the Yeast Genus Blastobotrys
Source: MDPI journal article supplement (doi:10.3390/jof8050418), 2022-04-19
Supplement: s1 [file s1]

Table S3: List of the plasmids used and constructed in this study

| Plasmid Name                | Base   | Promoter     | Expressed CDS                   | Yeast selection marker | Yeast integration site |
|-----------------------------|--------|--------------|---------------------------------|------------------------|------------------------|
| JMP1594                     | pDONR  |              | e-YFP                           |                        |                        |
| pARE12                      |        |              |                                 | hph                    | rDNA                   |
| pBS-SA-pTEF1-PHO5t          |        | <i>TEF1</i>  |                                 |                        |                        |
| pTEF1-eYFP-PHO5t            | pARE12 | <i>TEF1</i>  | e-YFP                           | hph                    | rDNA                   |
| pTDH3-eYFP-PHO5t            | pARE12 | <i>TDH3</i>  | e-YFP                           | hph                    | rDNA                   |
| pHSP26-eYFP-PHO5t           | pARE12 | <i>HSP26</i> | e-YFP                           | hph                    | rDNA                   |
| pPCK1-eYFP-PHO5t            | pARE12 | <i>PCK1</i>  | e-YFP                           | hph                    | rDNA                   |
| pTPS1-eYFP-PHO5t            | pARE12 | <i>TPS1</i>  | e-YFP                           | hph                    | rDNA                   |
| pXYL1-eYFP-PHO5t            | pARE12 | <i>XYL1</i>  | e-YFP                           | hph                    | rDNA                   |
| pTDH3-eYFP-PHO5t            | pBS-SA | <i>TDH3</i>  | e-YFP                           | hph                    | <i>TDH3</i>            |
| pTDH3-V5-ABN1-PHO5t         | pBS-SA | <i>TDH3</i>  | <i>BrABN1</i><br>(ARAD1D18216g) | nat                    | <i>TDH3</i>            |
| pTEF1-6xHis-AGU1-PHO5t      | pBS-SA | <i>TEF1</i>  | <i>BrAGU1</i><br>(ARAD1D23848g) | hph                    | <i>AGU1</i>            |
| pTDH3-SS-V5-AXH1-Flag-PHO5t | pBS-SA | <i>TDH3</i>  | <i>AsAXH1</i>                   | nat                    | <i>TDH3</i>            |
| pTEF1-SS-AXH1-Flag-PHO5t    | pBS-SA | <i>TEF1</i>  | <i>AsAXH1</i>                   | nat                    | rDNA                   |
