# Supplementary material for: Development of a Vector Set for High or Inducible Gene Expression and Protein Secretion in the Yeast Genus Blastobotrys
Source: MDPI journal article supplement (doi:10.3390/jof8050418), 2022-04-19
Supplement: s1 [file s1]

Table S2: List of primers used in this study

| Number                                                                                   | Name                       | Sequence                                                   |
|------------------------------------------------------------------------------------------|----------------------------|------------------------------------------------------------|
| <i>Promoter cloning</i>                                                                  |                            |                                                            |
| 1                                                                                        | YFP_ATG_BamHI              | CCGGATCCACAATGGTGAGCAAGGGCGAGG                             |
| 2                                                                                        | YFP_STOP_NotI              | CCGCGGCCGCTTACTTGTACAGCTCGTCCATG                           |
| 3                                                                                        | HSP26_Prom_UpSalI          | CAATCCTGGTCTGACGCTAC                                       |
| 4                                                                                        | HSP26_Prom_DoBamHI         | CCGGATCCTGTCGATACTGCTTCAAGTAAC                             |
| 5                                                                                        | PCK1_Prom_UpSalI           | CCGTCTGACTCTACCTAGACCTAAGTATTAAC                           |
| 6                                                                                        | PCK1_Prom_DoBamHI          | CCGGATCCTTTGAAAAGTTAATAAACAGATACT                          |
| 7                                                                                        | TDH3_Prom_UpSalI           | CCGTCTGACATGATGAGATTGATTGATCAGAT                           |
| 8                                                                                        | TDH3_Prom_DoBamHI          | CCGGATCCTGTTAACAAGTTTTATCAATTGC                            |
| 9                                                                                        | TPS1_Prom_UpSalI           | CCGTCTGACGGATACAAAGAACTACGTTTTAAG                          |
| 10                                                                                       | TPS1_Prom_DoBamHI          | CCGGATCCTGTTGCGACTAATCGTCCGTAA                             |
| 11                                                                                       | XYL1_Prom_UpXhoI           | GGCTCTGAGCTAGGTGATAAACATTGGTTATA                           |
| 12                                                                                       | XYL1_Prom_DoBamHI          | CCGGATCCTGCTGAGGAAGATGCCAC                                 |
| 13                                                                                       | TDH3_Prom_UpExt_F          | GAACATCAGTGACACTTGGCC                                      |
| 14                                                                                       | PHO5_Rev                   | GCCTGCAGATTTTAATCTTTCGGC                                   |
| 15                                                                                       | TEF1_For                   | TGGTCGACTTCAATCTATAATCAG                                   |
| <i>Secretion vectors construction and homologous and heterologous enzymes expression</i> |                            |                                                            |
| 16                                                                                       | BrABN1_ATG_Bam             | CCGGATCCACAATGAAGAGCCAATTGATCG                             |
| 17                                                                                       | BrABN1_SSV5_R              | ACCCAACAATGGATTTGGAATTGGTTTACCTGCCACCACAGAGCTCATAGAG       |
| 18                                                                                       | BrABN1_V5_F                | CCAAATCCATTGTTGGGTTTGGATTCACTAGTGCAAAGCTAAGACCGATGATTC     |
| 19                                                                                       | BrABN1_STOP_NotI           | GGGCGGCCGCTAAACGAGTTTTGGCCAACCGTC                          |
| 20                                                                                       | BrAGU1_ATG_BamHI           | CCGGATCCAAATGTGCATAGACTTCAATGC                             |
| 21                                                                                       | BrAGU1_SS6HIS_R            | CACGTGATGGTGATGGTGATGGCGGCCGCCGCCAACCCCTAAG                |
| 22                                                                                       | BrAGU1_6HIS_F              | CGGCGCGCCATCACCATCACCATCACGTGGAGAACGGCATAGATGGTTGG         |
| 23                                                                                       | BrAGU1_STOP_NotI           | GGGCGGCCGCTAGTCTATGATTCTCCAGGAAG                           |
| 24                                                                                       | BrAGU1_DoExt_R             | ATTGAGTCCAGAAAGGGGTC                                       |
| 25                                                                                       | BrAGU1_Verif_F             | GGAGTATTCTGCAAGACTGG                                       |
| 26                                                                                       | AsAXH1_10F_SpeI_BssHII     | CCACTAGTGCAGCCCTCTCGTCTCCACATTAC                           |
| 27                                                                                       | AsAXH1_972R_EagI_FLAG_NotI | GGGCGGCCGCTATTTATCATCATCATCTTTATAATCCGGCCGCTTCTGCTGGATAATC |
| <i>Phylogeny</i>                                                                         |                            |                                                            |
| 28                                                                                       | ITS1                       | TCCGTAGGTGAACCTGCGG                                        |
| 29                                                                                       | ITS4                       | TCCTCCGCTTATTGATATGC                                       |
| 30                                                                                       | NL1                        | GCATATCAATAAGCGGAGGAAAAG                                   |
| 31                                                                                       | NL4                        | GGTCCGTGTTTCAAGACGG                                        |
