# Supplementary material for: Development of a Vector Set for High or Inducible Gene Expression and Protein Secretion in the Yeast Genus Blastobotrys
Source: MDPI journal article supplement (doi:10.3390/jof8050418), 2022-04-19

Figure S3: Strategy for heterologous enzyme cloning and expression

A

1- *AsAXH1* cloning at *SpeI*-*NotI* sites of pBS-SA-pTDH3-V5-*BrABN1*-*PHO5t* (Figure S2A)

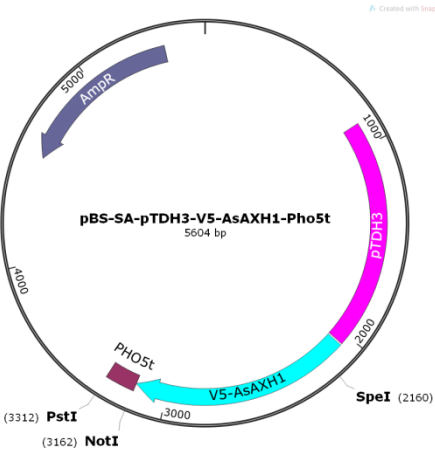

2- *nat* cloning at the *PstI* site of pBS-SA-pTDH3-V5-*AsAXH1*-FLAG-*PHO5t*

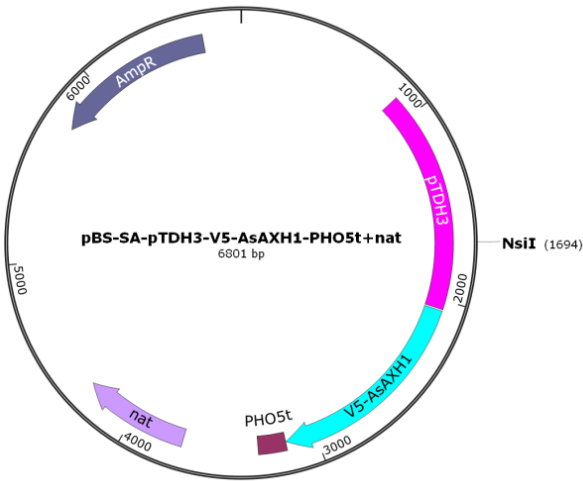

B

1- *AsAXH1* cloning at *BssHII*-*NotI* sites of pBS-SA-pTEF1-6xHIS-*BrAGU1*-*PHO5t* (Figure S2B)

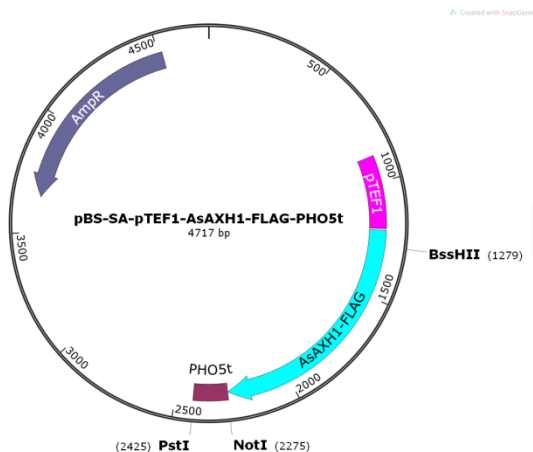

2- *nat* cloning at the *PstI* site of pBS-SA-pTEF1-SS-*AsAXH1*-FLAG-*PHO5t*

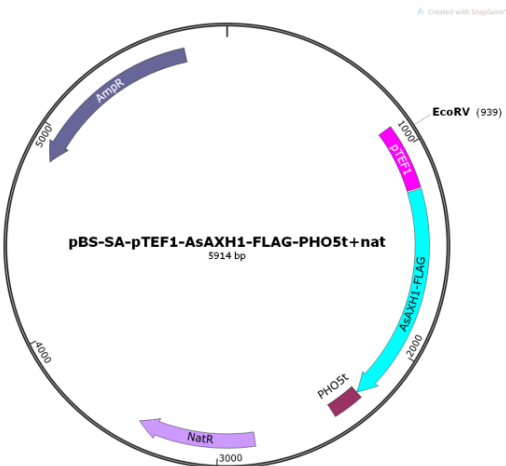

3- LS3 rDNA cloning at the *EcoRV* site of pBS-SA-pTEF1-SS-*AsAXH1*-FLAG-*PHO5t*+*nat*

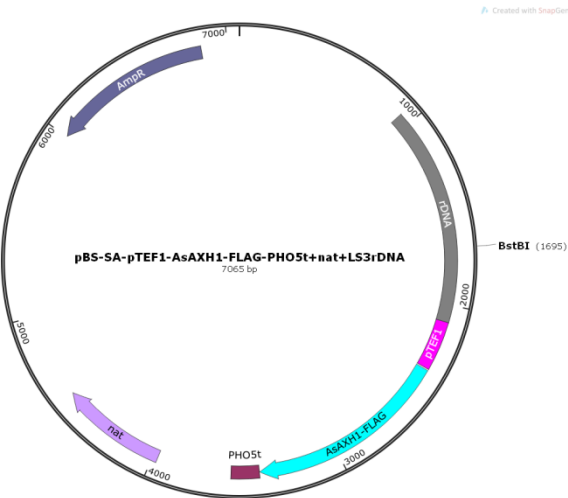

Supplement: s1 [file s1]
