# Supplementary material for: Development of a Vector Set for High or Inducible Gene Expression and Protein Secretion in the Yeast Genus Blastobotrys
Source: MDPI journal article supplement (doi:10.3390/jof8050418), 2022-04-19
Supplement: s1 [file s1]

Table S1: Yeast strains used in this study

| Yeast strains                                         | Phenotype           | Reference                                       |
|-------------------------------------------------------|---------------------|-------------------------------------------------|
| <i>Apiotrichum siamense</i> L8in5 (CLIB 3781)         | WT                  | This study                                      |
| <i>B. raffinosifermentans</i> LS3                     | WT                  | Wartmann et al. ; 1995,<br>Thomas et al. ; 2019 |
| <i>B. raffinosifermentans</i> CBS 8335                | WT                  | Thomas et al.; 2019                             |
| <i>B. yvelinesensis nomen nudum</i> L1-24 (CLIB 3782) | WT                  | This study                                      |
| <i>B. yvelinesensis nomen nudum</i> L2-36 (CLIB 3783) | WT                  | This study                                      |
| <i>B. illinoisensis</i> YB-1343                       | WT                  | Kurtzman et al. ; 2007                          |
| <i>B. malaysiensis</i> Y-6417                         | WT                  | Kurtzman et al. ; 2007                          |
| <i>B. mokoensis</i> Y-27120                           | WT                  | Ravn et al.; 2021                               |
| CBS8335+rDNA::pTEF1-eYFP-PHO5t::rDNA                  | hp4d- <i>hph</i>    | This study                                      |
| CBS8335+rDNA::pTDH3-eYFP-PHO5t::rDNA                  | hp4d- <i>hph</i>    | This study                                      |
| CBS8335+rDNA::pHSP26-eYFP-PHO5t::rDNA                 | hp4d- <i>hph</i>    | This study                                      |
| CBS8335+rDNA::pPCK1-eYFP-PHO5t::rDNA                  | hp4d- <i>hph</i>    | This study                                      |
| CBS8335+rDNA::pTPS1-eYFP-PHO5t::rDNA                  | hp4d- <i>hph</i>    | This study                                      |
| CBS8335+rDNA::pXYL1-eYFP-PHO5t::rDNA                  | hp4d- <i>hph</i>    | This study                                      |
| CBS8335+TDH3::pTDH3-eYFP-PHO5t                        | hp4d- <i>hph</i>    | This study                                      |
| CBS8335+TDH3::pTDH3-ABN1-PHO5t                        | pYITEF1- <i>nat</i> | This study                                      |
| CBS8335+AGU1::pTEF1-AGU1-PHO5t                        | hp4d- <i>hph</i>    | This study                                      |

CLIB numbers refer to the French CIRM-levures <https://cirm-levures.bio-aware.com>
