# Supplementary material for: Development of a Vector Set for High or Inducible Gene Expression and Protein Secretion in the Yeast Genus Blastobotrys
Source: MDPI journal article supplement (doi:10.3390/jof8050418), 2022-04-19

Figure S1: Cloning strategy for plasmids with different expression cassettes

1- eYFP cloning at *Bam*HI-*Not*I sites of pBS-SA-pTEF1-PHO5t (Boër *et al.*, 2009)

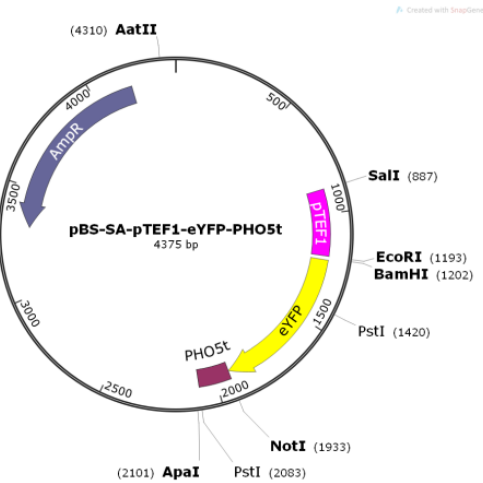

2- Promoter amplification and cloning at the *Sall*-*Bam*HI sites of pBS-SA-pTEF1-eYFP-PHO5t

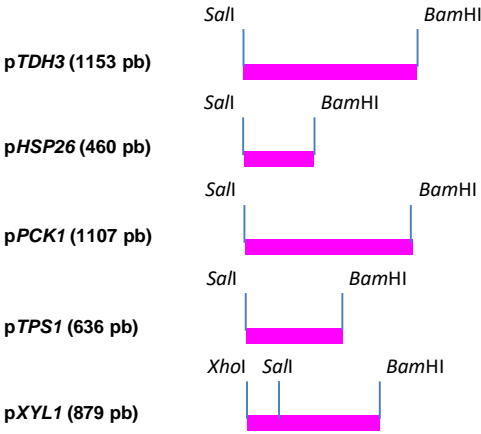

3- Cloning of expression cassettes at *Sall*-*Apa*I the pARE12 plasmid (Sanaya *et al.*, 2020)

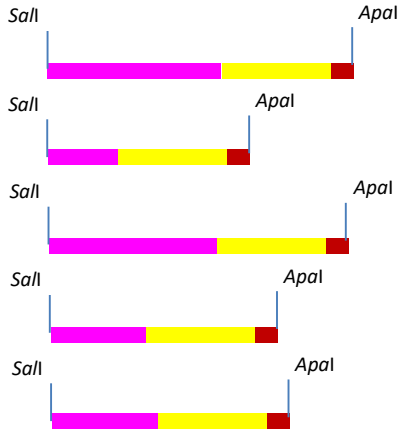

4-Cloning of the Hygromycin resistance cassette in the pBS-SA-pTDH3-eYFP-PHO5t at the *Aat*II-*Sall* sites

The final pBS-SA-pTDH3-eYFP-PHO5t +Hph plasmid

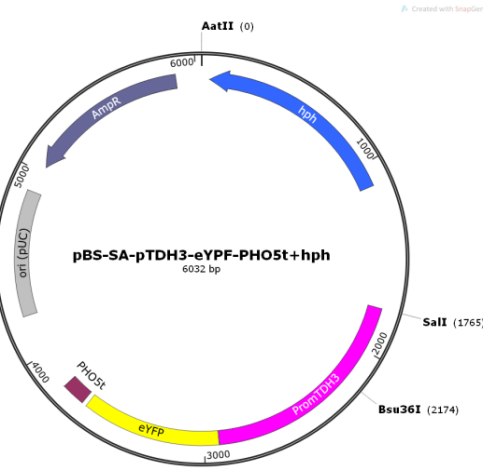

The 6 final pARE12 plasmids

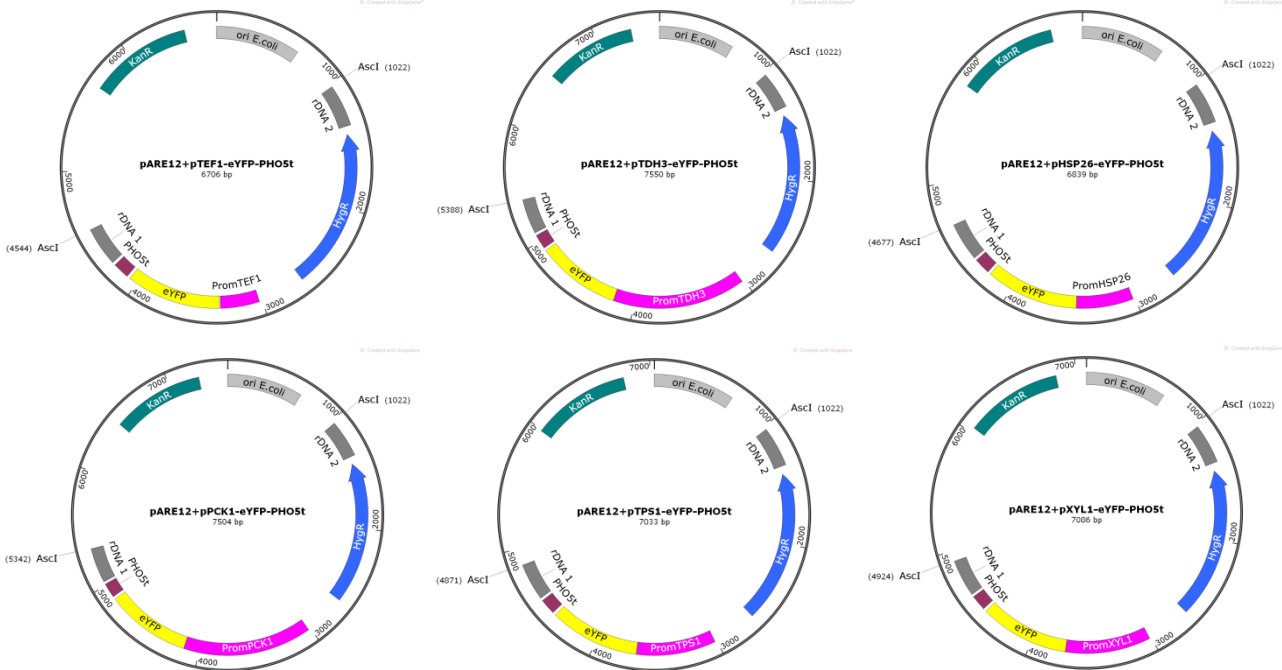

Supplement: s1 [file s1]
