# Supplementary material for: Development of a Vector Set for High or Inducible Gene Expression and Protein Secretion in the Yeast Genus Blastobotrys
Source: MDPI journal article supplement (doi:10.3390/jof8050418), 2022-04-19
Supplement: s1 [file s1]

## File S5: Sequences and alignment of feruloyl esterase

>1\_Blastobotrys.raffinosisifermetans\_ARAD1A06094

MASIPFFVEMKHFLGQSLTSLAAGAFGSSSLAEVCTSSRIRLTALPKDAIAGISMDPDSITANPVYNASAGYSVFYPEGNFDYCNVTVSYCHI  
GKGDKVNLQYWLPSPDKFQNRYLATGGGGYAINSGTQSLPGGVMYGAVAGRTDGGFGGFDVQVSEAILYANGSLNYDSLVMFGYRAIGEQTMI  
QELARGFYELGDEKKIYTYYYQGCGSEGGREGWSQIQKFPDLYDGVIPAAPAFRYGHQQVNLHFPGVIEQGMNYYPPCEMARIVNATIEACDKLD  
GKIDGVVSRTDCLLNDFDNSTIGLHYTCEAGSNPMTGDSTPAQNGTVSTKAABELARVLTEGLHDSQGNKAYVFYQITAGYDDADTKYNPATGQ  
FELSVSLSLGGEWVTKFLQLVDLDNLPLNDNVTVDTLVDWMQCGWQTYEDVLQTTTRPDLPLYERAGGKILTFHGESDINSIPAGSSVHFYESVRNV  
MYPGISFNQSTDAMGEWYRLYLVPGAHCSINALQPNPGFPQTTLLEVMIWDWENGNTPTTLQATYLVGDNKGKPAEICPWPLRPWTDEGSKLQ  
CVYDHTSINTWMYDFNAFSLPVY

>2\_Blastobotrys.raffinosisifermetans\_ARAD1A19822

MKNVILPIIATLLASTAYATASLADVCTSSYVRQAMPNGTIEGIVNLLSSVTANPVYNASSSGQVFFPDATYDYCNVTVSYSHNGLQDNVNL  
FWLPSPSAFQNRYLATGGGGFAINS GTSLPGGVMYGAVAGSTDGGFGSFNNELTDVILYANGT'LN'YDALYMFYRAIGEQTMIKELAKNFYK  
TDDKIYTYYYQGCGSEGGRDGWSQVQKYPELYDGVIPGAPAFRYGQQQVNLHLPNVMQETMDYPPPCELSKI'VN'ATIEACDKLDGLEDDGVVSRTD  
LCMLHFNVNSTIGMPYCAASSGQGGPMGMSGSTSSTPAQNGTVSAKGAALVQTMLDGLHDLQGRRAYISYISAEFSDAENSDTSFEL  
SINSQSGEWVTKFLQLVDTDNLSTLDGVTYDTLRDWMELGWQRYEDVLQTTWPDLSKYKEKGGKILHFGESDPSIPAGSSVHYDYSDVRSIMFP  
DQSYNASIEAMNDFYRLYLIPGAHCSNTQLQPNPGFPQTNLAVMIDWVEKGIAPNRLNATHLGGDYKGSAAEICPWPLRPLWTNNGTSLNCVF  
DRTSLNTWKYKFDAYKPLPLY\*

>Aspergillus.niger\_CBS 101883\_XP\_025455234.1 tannase and feruloyl esterase

MAGLSATAAHAASLADVCTTSNVKAALPSSVYGLTMI PSSVTASPVYNASTSGQVFFPDATYDYCGVTFNYTHNGRGDTVKLQYWLPAPESFEN  
RFLATGGMAYMITGGSSYLPGGVMYGAVAGTTDGGFGGELDTAFLLANGTINYEALYSMGYHIGELTIVGKEFTKNFYSMGDEKLYTYYYQCS  
EGREGFSQVQKYPGVYDGVIPGAPAIRYQQQANHLYSNVVEQTLGYPPPCLEKIVNATIDACDSDLGKVDGVVARTDLCQLHFNINSTIG  
LPYHCAASSSSSITGLNYKGRSTDPAINGTVSAQGVAVAAEILKGLHDSKGRRAYISYQPTASFDAAETSYNSETGEYELSIASSGGEWVAKFLE  
LRDADNLSTLDNVTYDTLRDWMELGWKRYEDVMQTTWPDLTEFEKAGGKIITFHGESDQSIHTGSSVHFYNSVRSIMYPDMSYNASVAAMGDWY  
RLFLVPGAACATNDLQANGFPQTNLAVMINWVEKGVVPHTLNATHLAGEWEGQNAQLCSWPLRPLWTENGTFKNCVYDQASVDTWDYNFDSY  
KVPLY

>Aspergillus.heteromorphus\_CBS 117.55\_XP\_025395144.1 tannase and feruloyl esterase

MRRAALTAGLSATTAYAAASLADVCTTSNVKAALPASGAIQGLTMI PSSVTASPVYNASSSGEVFFPDATYDYCGVTFNYTHNGRDDTVALTYWL  
PSPDTFENRFLATGGMAYMISAGSAYLPGGVMYGAVAGTTDGGFGGSLDTVFLLANGTINYEALYSMGYHIGELTMVGKEFTKNFYNMDDNK  
LYTYYYQGCGSEGGRAGWSQVQKYPQVYDGIIPGAPAIRYQQQANHLYSNVVEQTLGYPPPCELERIVNATIDACDSDLGKVDGVVARTDLCML  
NFDLNSTIGLSYSCAASSSSGIGLGFGRSDPASNGTVSAEGVAVASEILKGLHDSQGRRAYISYQPSASFDAATEYNSATGEYELDIASSTGG  
EWIVRFLLELIDADNLSSITNVTYDVLDRDWMELGWKRYEDVLQTTWPDLTSEFEQAGGKILTFHGESDPSIPTGSSVHFYESVRSIMYPELGYNAS  
VDAMGDWYRLYMLVPGAACATNDVQANGFPQTNLAVMIDWVENGVTPTTLNATHLAGEWEGDNAQLCAWPLRPLWTENGTFKNCVYDQPSIDT  
WNYTFDSYKVPLY

>Aspergillus.ellipticus\_CBS 707.79\_PYH90982.1 tannase and feruloyl esterase

MRRAALTAGLGATTAYAAASLADVCTTANVKAALPASGAIDGLTMI PSSVSASPVYNASTSGQVFFPDATYDYCDVTFNYTHNGRGDTVALEYWL  
PSPDTFENRFLATGGMAYMISGTTSLPGGVQYGAAGTTDGGFGGSLDTVFLLANGTINYEALYSMGYHIGELTLVGKEFTKNFYSMGDDKL  
YTYYYQGCGSEGGREGWSQVQKYPGVYDGVIPGAPAIRYQQQANHLYSNVVEQTLGYPPPCELERIVNATIDACDSDLGKVDGVVARTDLCMLH  
FDINSTIGLSYSCAASSGGGIGLGFGRSDPASNGTVSAQGVAVASEILKGLHDSQGRRAYISYQPSASFDAATEYNSATGEYELDIASSTGGE  
WIAKFLELRDADNLSTLENVTYDVLDRDWMELGWKRYEDVMQTTWPDLTFEFAAGGKIITFHGESDPSIPTGSSVHFYESVRSIMYPELAYNASV  
SAMDWYRLFLVPGAACATNDVQANGFPQTNLAVMINWVEKGIITPTTLNATHLAGDYEEDDNAQLCAWPLRPLWTENGTFKNCVYDQPSIDTW  
NYTFDSYKLPLY

>Ophiobolus.disseminans\_KAF2833293.1 feruloyl esterase-like protein B precursor

MHFYQSLAAGAAFTIIHAVSLADTCTVSRVLASLPANGTFLGISLDSTSITANAVYNASNTAQFFFPAAATYDYCNVTLSYSHNARGDGVNLQY  
WFPTPDNFKNRYLSTGGGGYAINSGSQGFPGGVMYGAVAGSTDGGFGSFKTKLDAVVLKANGTLNWDAIFMFGYQAIGELTQIGKGITRNFYSI  
GEDDKLYTYYYQACSEGGREGMSQIQRYGEEYDGVIPGAPALRYAQQQVQHLYSNVVEKTLDYFPSSCEFORIVNATIKFCDPLDGKTDGVVART  
DLCKLQFNINSTIGLPYSCAASSAAGLGFNFSSKSKRQMPPGGGASTPAANGTVSAQAVAVASTIMSGLHSDGQFAYFYSQPSSSFEDAKTTY  
NNETDSYELSIASSTGGEFVTKFIQMVADNLASLDNVTYDTLVEWMREAWIKYEDTLQTTLPDLTPFYNNGGKVLTFHGESDINSIPAASSVHYH  
ESVRSIMYPNSTFNASTEAMGEWYRLFLVPGAGHCGVNSMQPNPGFPPTTNLEVLIEWVENGVKPETLRATHTAGDEKQGSAAEICAWPLRPYVWN  
NGTNMECVYDQASVDSWMFEFDAWKMPLY

>Lophiotrema.nucula\_KAF2119681.1 Tannase/feruloyl esterase

MKPQRAFLGSVFTTVVHSTALDELCTPSHVQASLPANGSISGIAPIPSSVTANAVYNASVSDNYPAATFDYCNVTFSYTHVGRNDIVNLQYW  
LPSPDKFKQRYLATGGGGFAINS GTMMLPSGLQNGAVAGVTDGGFGFSFTQLDAIFLLANGTINYEPLFMFGYRAIGEQT'KV'GKALAKNFFSMN  
STEKLYTYYYQGCGSEGGREGWSQVQRYPEEYDGVIPGAPAFRFAQQQVQHLYSNVVEQTLDYYPSTCEFDKIANETIKACDSDLGKTDGVVARTD  
LCILQFNVSSSLVGTPIYFCTASAGSSPFPGGPAGSPTPVQNGTISAKGAEVAQTI'LN'GLHDSQGRRAYISYQPATTFVDGATKYNNITGEWELSI  
NSMGGEYVTKFLQLVNI'SN'LNLDNVTYDTLRDWMQQGWMTYEDTLQTTLPDLTPYQSKGGKVLHWHGESDINSIPTGSSVHYHESVRSVMYPSL  
SFNESSAALSDWYKFLFLVPGAACATNPLQPNGAFPNTNLAVMIDWVENAVEPSTLNATHLTGSNLGAQEQQLCAWPLRPPYSGNATSPACVYDQ  
KSIDSWMYDFNAYKPLPLY

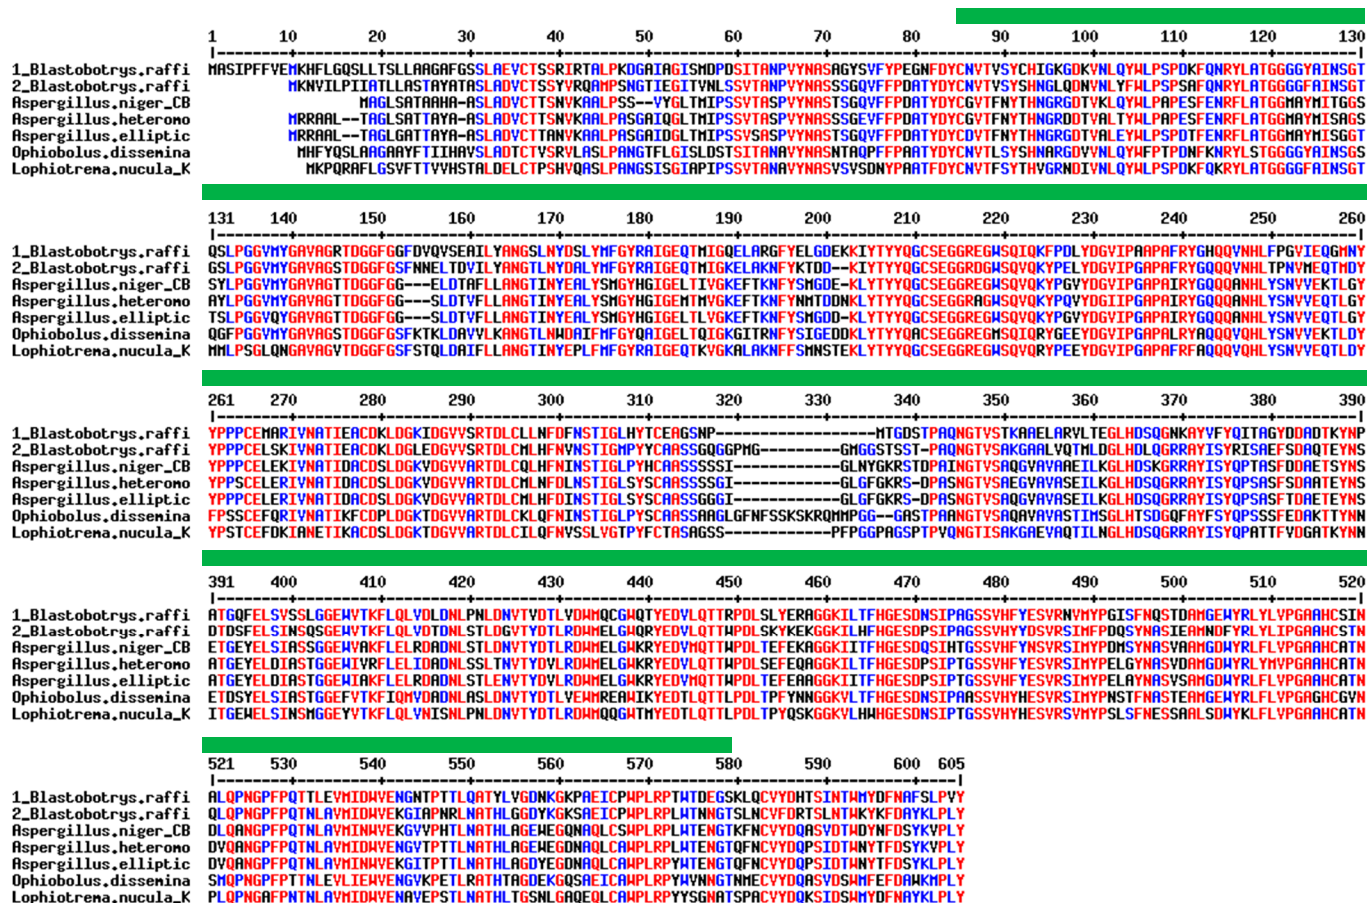

Alignments were performed with the Multalin server (<http://multalin.toulouse.inra.fr/multalin/>). The *B. raffinosifermentans* ARAD1A06094 and ARAD1A19822 predicted proteins were aligned with *Aspergillus niger* CBS 101883 XP\_025455234.1, *Aspergillus heteromorphus* CBS 117.55 XP\_025395144.1, *Aspergillus ellipticus* CBS 707.79 PYH90982.1, *Ophiobolus disseminans* KAF2833293.1 and *Lophiotrema nucula* KAF2119681.1 conserved proteins

Amino acids 85 to 561 of the *B. raffinosifermentans* Tan1 protein (ARAD1A06094) correspond to the pfam07519 conserved domain (de Vries et al.; 2002)
