# Supplementary material for: Development of a Vector Set for High or Inducible Gene Expression and Protein Secretion in the Yeast Genus Blastobotrys
Source: J Fungi (Basel). 2022 Apr 19;8(5):418. doi: 10.3390/jof8050418 (PMC9144253; doi:10.3390/jof8050418)
Supplement: Supplementary file 1 [file jof-08-00418-s001.zip]

Archive with 14 entries (14 files):
- FigureS1.pdf
- FigureS2.pdf
- FigureS3.pdf
- FigureS4.pdf
- FileS1.pdf
- FileS2.pdf
- FileS3.pdf
- FileS4.pdf
- FileS5.pdf
- TableS1.pdf
- TableS2.pdf
- TableS3.pdf
- TableS4.pdf
- TableS4_D1D2-ITS_identity.xlsx
