# Supplementary material for: Development of a Vector Set for High or Inducible Gene Expression and Protein Secretion in the Yeast Genus Blastobotrys
Source: J Fungi (Basel). 2022 Apr 19;8(5):418. doi: 10.3390/jof8050418 (PMC9144253; doi:10.3390/jof8050418)
Supplement: Supplementary file 1 [file jof-08-00418-s001.zip › TableS4_D1D2-ITS_identity.xlsx]

## Sheet: Feuil1
Table S4: Sequence identity in the ITS and D1D2 domains of the 26S rRNA gene of Blastobotrys species
		Y6417	Y27120	YB1343	L1-24	L2-36
B. malaysiensis	Y6417	1134	0.99	0.97	0.97	0.97
			0	0	0	0
B. mokoenaii	Y27120	1125	1136	0.97	0.97	0.97
		2		0	0	0
B. illinoisensis	YB1343	1114	1113	1132	0.97	0.97
		8	6		0	0
B. yvelinesensis	L1-24	1113	1113	1111	1134	1
		10	8	4		0
B. yvelinesensis	L2-36	1113	1113	1111	1134	1134
		10	8	4	0
