# Supplementary figures and images for: Development of a Vector Set for High or Inducible Gene Expression and Protein Secretion in the Yeast Genus Blastobotrys
Source: MDPI journal article supplement (doi:10.3390/jof8050418), 2022-04-19

**Figure S4: EZ-blue gel corresponding to Figure 2A**

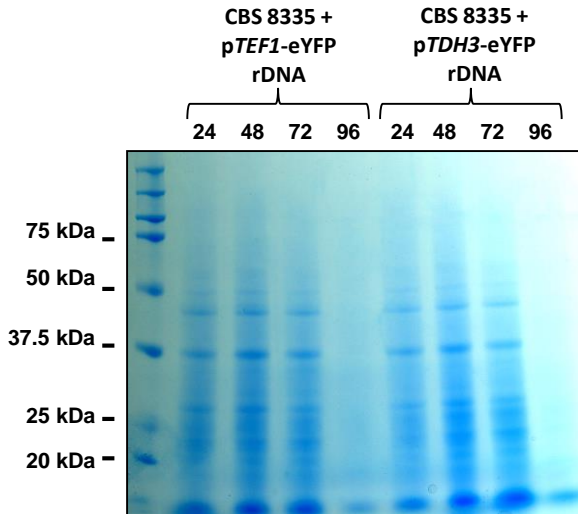

Supplement: s1 [file s1]
